# Supplementary material
Source: PubMed Central journal article supplement (PMC9633792)
Supplement: 41467_2022_34080_MOESM1_ESM.pdf [file 41467_2022_34080_MOESM1_ESM.pdf]

**Tu et al**, Tyrosine phosphorylation regulates RIPK1 activity to limit cell death and inflammation

**Supplementary Information:**

Supplementary Figures 1, 2, 3, 4, 5, 6, 7, 8.

Supplementary Tables 1, 2, 3, 4, 5.

## Supplementary Figures

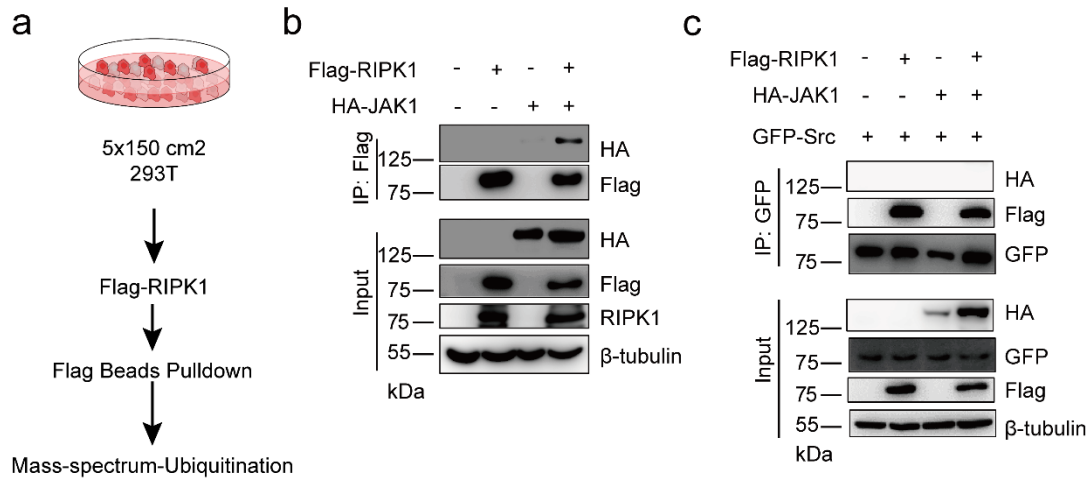

### Supplementary Figure 1: Identification of tyrosine phosphorylation as potential regulation of RIPK1 activity

**a** Schematic overview of mass spectrometry analysis-mediated identification of RIPK1 interacting proteins in 293T cells. PSM: peptide-spectrum match. **b** RIPK1 KO HEK293T cells co-transfected with Flag-RIPK1 and HA-JAK1 for 24h. Cell lysates were immunoprecipitated with anti-Flag-Protein A/G agarose and analyzed by immunoblotting with the indicated antibodies. **c** HEK293T cells co-transfected with Flag-RIPK1, HA-JAK1 and GFP-SRC for 24h. Cell lysates were immunoprecipitated with anti-GFP resin and analyzed by immunoblotting with the indicated antibodies.

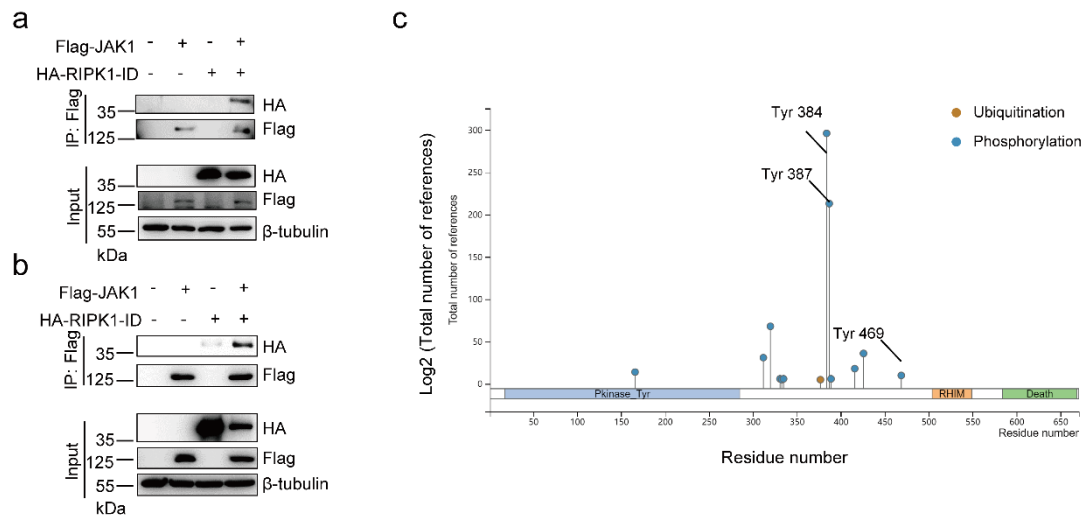

**Supplementary Figure 2: Y384 is a major tyrosine phosphorylation site of RIPK1**  
**a, b** WT (**a**) or RIPK1 KO (**b**) HEK293T cells co-transfected with HA-RIPK1-ID and Flag-JAK1 for 24h. Cell lysates were immunoprecipitated with anti-Flag-Protein A/G agarose and analyzed by immunoblotting with the indicated antibodies. **c** Schematic of RIPK1 phosphorylation sites from the PhosphoSitePlus database. HTP, high-throughput papers.

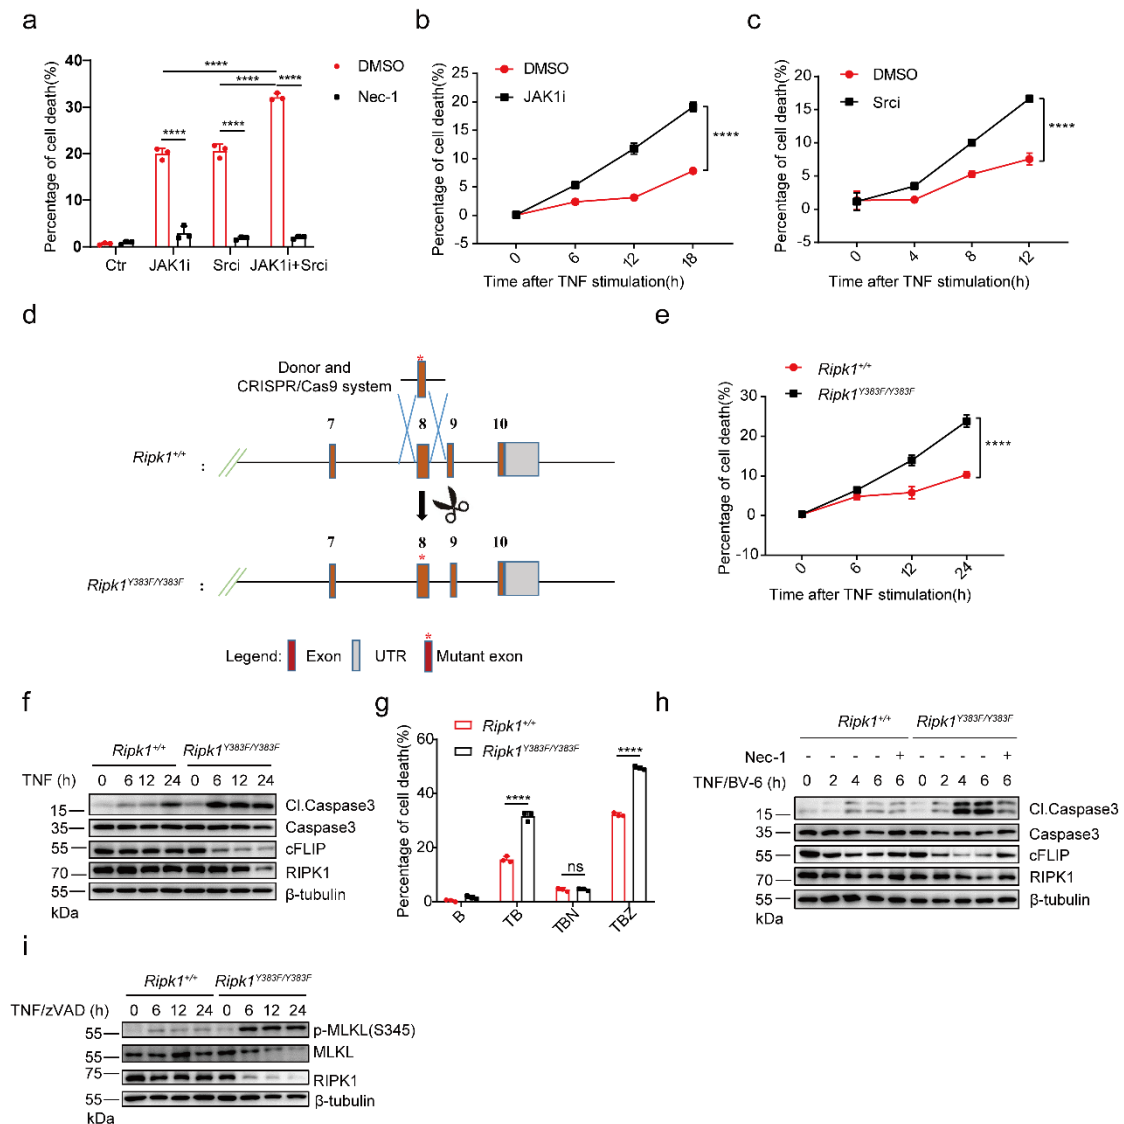

### Supplementary Figure 3: Loss of tyrosine phosphorylation of RIPK1 promotes TNF-induced apoptosis and necroptosis

**a** Primary WT BMDMs were stimulated by TNF/BV-6 with or without Nec-1 (RIPK1 inhibitor), JAK1 and SRC inhibitors for 24h. Cell death were measured by SytoxGreen positivity. **b, c** Immortalized WT MEFs were stimulated by TNF with or without JAK1 (**b**) or SRC (**c**) inhibition treatment for indicated time points and cell death were measured by SytoxGreen positivity. **d** Schematic overview of strategy to generate *Ripk1*<sup>Y383F/Y383F</sup> mice by CRISPR-Cas9 technology. **e, f** *Ripk1*<sup>+/+</sup> and *Ripk1*<sup>Y383F/Y383F</sup> immortalized MEFs were stimulated by TNF for indicated time points. Whole-cell lysates were collected for western blotting (**f**) and cell death were measured by SytoxGreen positivity (**e**). **g** *Ripk1*<sup>+/+</sup> and *Ripk1*<sup>Y383F/Y383F</sup> immortalized MEFs were treated by different stimulators for 6h. Cell death were measured by SytoxGreen positivity. T: TNF; B: BV-6; Z: zVAD.fmk; N: Necrostatin-1. **h, i** *Ripk1*<sup>+/+</sup> and *Ripk1*<sup>Y383F/Y383F</sup> immortalized MEFs were stimulated by TNF/BV-6 (**h**) and TNF/zVAD (**i**) for indicated time points and whole-cell lysates were collected for western blotting. TNF: 100 ng/ml (**b-c, e-f, i**) and 10 ng/ml (**a, g-h**); BV-6: 2.5 μM; zVAD.fmk: 20 μM; Necrostatin-1: 10 μM; JAK1 inhibitor: 10μM; Src inhibitor: 10μM. In **a-c, e** and **g**, data

are represented as mean  $\pm$  SEM (n = 3 independent cell samples). Statistical significance was determined using a two-tailed unpaired t test. n.s.,  $p > 0.05$ ; \*\*\*\*  $p < 0.0001$ .

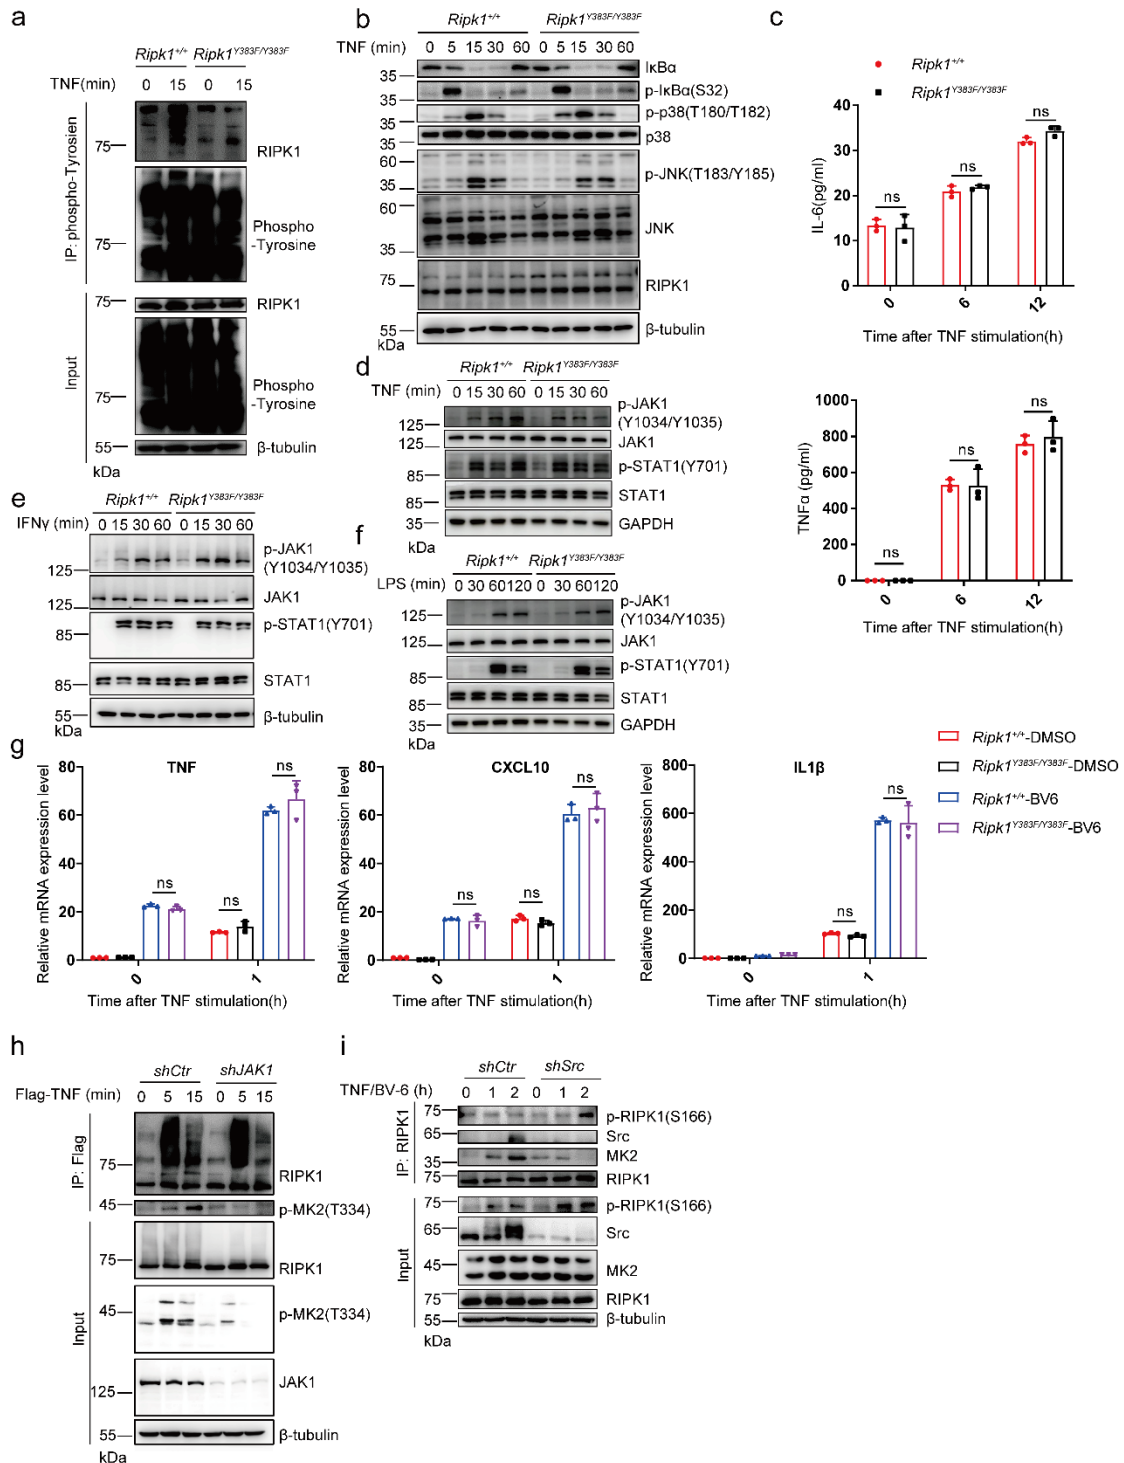

### Supplementary Figure 4: Tyrosine phosphorylation of RIPK1 is essential for limiting RIPK1 kinase activity

**a** *Ripk1*<sup>+/+</sup> and *Ripk1*<sup>Y383F/Y383F</sup> immortalized MEFs were stimulated with TNF (10 ng/ml) for indicated time points. Whole-cell lysates were immunoprecipitated with anti-phospho-tyrosine antibody for western blotting with indicated antibodies. **b**, **d-f** *Ripk1*<sup>+/+</sup> and *Ripk1*<sup>Y383F/Y383F</sup> primary BMDMs were stimulated with TNF (**b**, **d**: 10 ng/ml), IFN $\gamma$  (**e**: 10 ng/ml) and LPS (**f**: 10 ng/ml) for indicated time points. Whole-cell lysates were collected for western blotting with indicated antibodies. **c** Primary *Ripk1*<sup>+/+</sup> and *Ripk1*<sup>Y383F/Y383F</sup> BMDMs were stimulated with TNF (10 ng/ml) at different

time point. The expression level of inflammatory IL6 and TNF were measured by ELISA. **g** Primary *Ripk1*<sup>+/+</sup> and *Ripk1*<sup>Y383F/Y383F</sup> BMDMs were stimulated with TNF (10 ng/ml) at indicated time point with or without BV-6 (2.5 uM) pretreatment. The transcriptional and expression level of inflammatory NF-κB target genes were measured by qPCR. **h, i** Immortalized WT MEFs with or without knockdown of JAK1 (**h**) or Src (**i**) were treated with Flag-TNF (100 ng/ml) (**h**) or TNF (10 ng/ml)/BV-6 (2.5 uM) (**i**) for indicated time points and whole-cell lysates were immunoprecipitated using anti-Flag resins (**h**) or anti-RIPK1 (**i**) antibody for western blotting with indicated antibodies. Data are represented as mean ± SEM. Statistical significance was determined using a two-tailed unpaired t test. n.s.,  $p > 0.05$ .

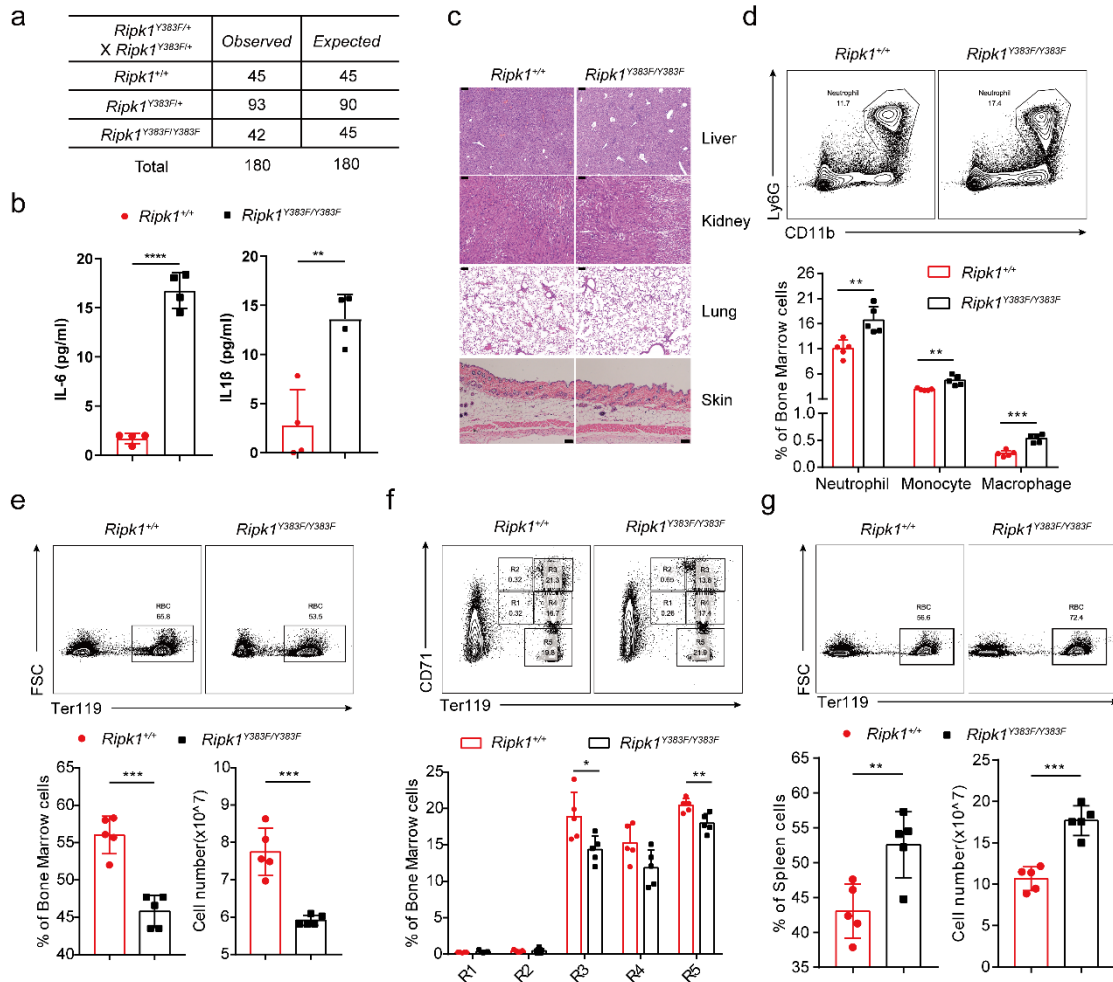

### Supplementary Figure 5: RIPK1 Y383F mice develop systemic inflammation and emergency hematopoiesis

**a** Quantification of genotypes of offspring mice from intercrosses of *Ripk1*<sup>Y383F/+</sup> mice. **b** The level of IL6 and IL1 $\beta$  in serum of *Ripk1*<sup>+/+</sup> (n = 4) and *Ripk1*<sup>Y383F/Y383F</sup> (n = 4) mice at age of 8 weeks. **c** Representative images of H&E staining of liver, kidney, lung and skin tissue from *Ripk1*<sup>+/+</sup> and *Ripk1*<sup>Y383F/Y383F</sup> mice at age of 8 weeks (Scale bar, 100  $\mu$ m). **d** Flow cytometry and statistical analysis of neutrophils, monocytes and macrophages in the bone marrow from *Ripk1*<sup>+/+</sup> (n = 5) and *Ripk1*<sup>Y383F/Y383F</sup> (n = 5) mice at age of 8 weeks. **e-g** Flow cytometry and statistical analysis of erythroid lineage Ter119<sup>+</sup> cells (**e**, **g**) and different erythroblast populations (**f**) in the bone marrow (**e**, **f**) and spleen (**g**) from *Ripk1*<sup>+/+</sup> (n = 5) and *Ripk1*<sup>Y383F/Y383F</sup> (n = 5) mice at age of 8 weeks. R1 contains immature red blood cell progenitors, including primitive and later-stage erythroid progenitor cells (erythroid burst-forming unit (BFU-E) and colony-forming unit (CFU-E), respectively); R2 comprises mainly pro-erythroblasts and early basophilic erythroblasts; R3 contains both early and late basophilic erythroblasts; R4 is composed of chromatophilic and orthochromatophilic erythroblasts; R5 consists of late orthochromatophilic erythroblasts and reticulocytes. Data are represented as mean  $\pm$  SEM. Statistical significance was determined using a two-tailed unpaired t test. \**p* < 0.05; \*\**p* < 0.01; \*\*\**p* < 0.001; \*\*\*\**p* < 0.0001.



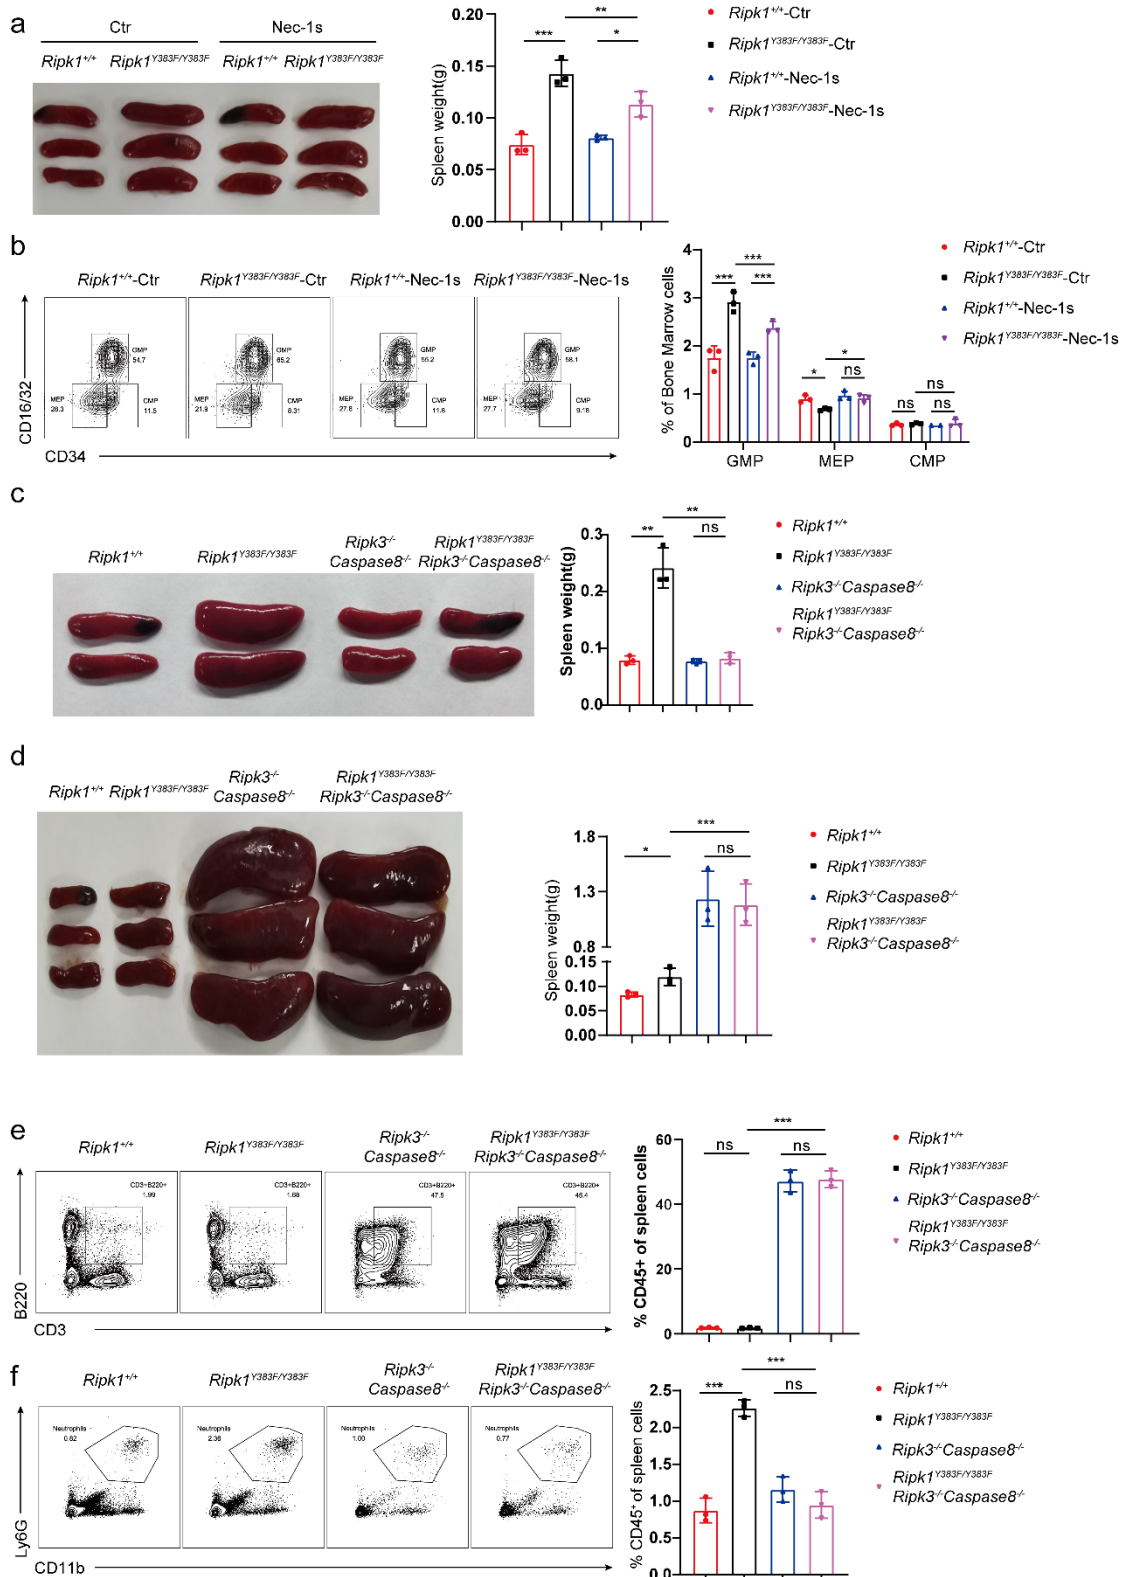

**Supplementary Figure 6: TNF-induced cell death is responsible for systemic inflammation and emergency hematopoiesis in RIPK1 Y383F mice**

**a, b** *Ripk1*<sup>+/+</sup> and *Ripk1*<sup>Y383F/Y383F</sup> mice were treated with Nec-1s (3mg/kg) every one day after 3 weeks old (n = 3). After 8 weeks, Representative images and weight of skin tissue (a) and neutrophils (CD11b<sup>+</sup>Ly6G<sup>+</sup>) (b) in the spleen were analyzed. **c, d** Representative images and statistical analysis of spleen tissue from *Ripk1*<sup>+/+</sup>,

*Ripk1*<sup>Y383F/Y383F</sup>, *Ripk3*<sup>-/-</sup>*Caspase8*<sup>-/-</sup> and *Ripk1*<sup>Y383F/Y383F</sup> *Ripk3*<sup>-/-</sup>*Caspase8*<sup>-/-</sup> mice at age of 8 (c) and 16 (d) weeks (n = 3). e, f Flow cytometry and statistical analysis for CD3+B220+ lymphocytes (e) and neutrophils (CD11b<sup>+</sup>Ly6G<sup>+</sup>) (f) in the spleen from *Ripk1*<sup>+/+</sup>, *Ripk1*<sup>Y383F/Y383F</sup>, *Ripk3*<sup>-/-</sup>*Caspase8*<sup>-/-</sup> and *Ripk1*<sup>Y383F/Y383F</sup> *Ripk3*<sup>-/-</sup>*Caspase8*<sup>-/-</sup> mice at age of 16 weeks (n = 3). Data are represented as mean ± SEM. Statistical significance was determined using a two-tailed unpaired t test. n.s.,  $p > 0.05$ ; \* $p < 0.05$ ; \*\* $p < 0.01$ ; \*\*\* $p < 0.001$ .

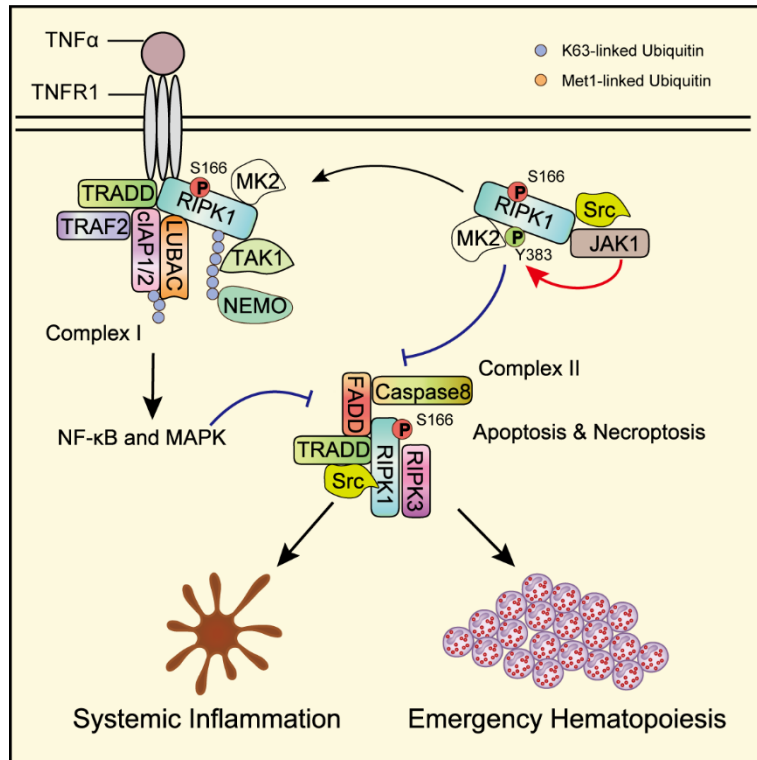

**Supplementary Figure 7: Proposed model that tyrosine phosphorylation of RIPK1 on Y383 regulates RIPK1 kinase activity to prevent cell death and inflammation**

**Up**, ligation of TNF on TNFR1 induces formation of TNF-RSC, and subsequent phosphorylation and ubiquitination of RIPK1 to activate NF- $\kappa$ B and MAPK-dependent survival genes. These post-translational modifications of RIPK1 could stabilize TNF-RSC and further inhibit cytotoxic activity of RIPK1. Herein, we identify non-receptor tyrosine kinases JAK1 and SRC could phosphorylate RIPK1 on Y383 to recruit and activate downstream kinase MK2. **Down**, deficiency of tyrosine phosphorylation of RIPK1 by Y383F mutation activates RIPK1 kinase partially though blocking MK2 activation, which leads to enhanced TNF-induced apoptosis and necroptosis and systemic inflammation and emergency hematopoiesis in *Ripk1*<sup>Y383F/Y383F</sup> mice.

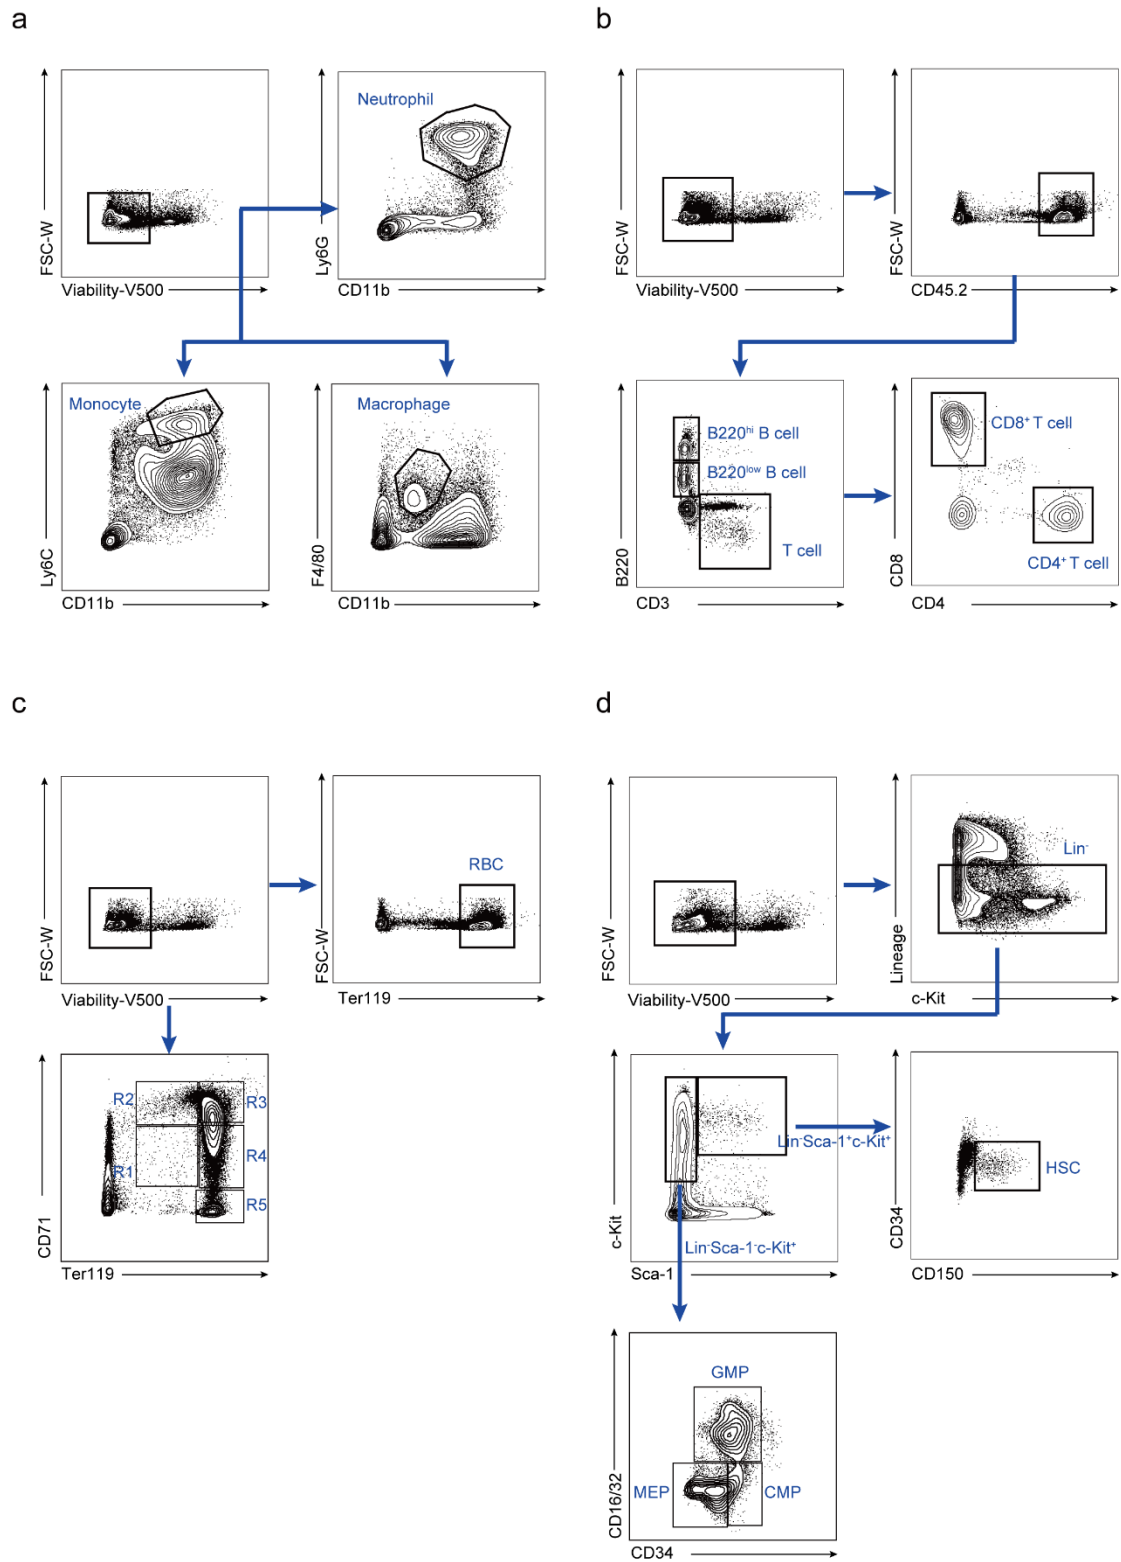

**Supplementary Figure 8: Hematopoietic gating strategy**

**a**, For characterization of myeloid cell in spleen and bone marrow, the living cell fractions gated from preliminary FSC/SSC gates could be further divided into  $CD11b^+Ly6G^+$  neutrophils,  $CD11b^+Ly6C^+$  inflammatory monocytes,  $CD11b^+F4/80^+$  macrophages. **b**, For characterization of lymphocytes in spleen, bone marrow and thymus, the living cell fractions gated from preliminary FSC/SSC gates could be further

divided into B220<sup>+</sup> B cells, CD3<sup>+</sup> T cells, B220<sup>-</sup>CD3<sup>+</sup>CD4<sup>+</sup> T cells and B220<sup>-</sup>CD3<sup>+</sup>CD8<sup>+</sup> T cells. **c**, For characterization of red blood cells and erythroblast populations in spleen, bone marrow, the living cell fractions gated from preliminary FSC/SSC gates could be further divided into Ter119<sup>+</sup> red blood cells, Ter119<sup>int</sup>CD71<sup>int</sup> erythroblast R1, Ter119<sup>int</sup>CD71<sup>high</sup> erythroblast R2, Ter119<sup>high</sup>CD71<sup>high</sup> erythroblast R3, Ter119<sup>high</sup>CD71<sup>int</sup> erythroblast R4 and Ter119<sup>high</sup>CD71<sup>low</sup> erythroblast R5 population. **d**, For characterization of hematopoietic progenitor populations in bone marrow, the living cell fractions gated from preliminary FSC/SSC gates could be further divided into Lin<sup>-</sup>Sca-1<sup>+</sup>Kit<sup>+</sup> (LSKs) progenitors, Lin<sup>-</sup>Sca-1<sup>-</sup>Kit<sup>+</sup> (LKs) progenitors, LSK-CD150<sup>+</sup>CD34<sup>-</sup> Hematopoietic stem cells, Lin<sup>-</sup>Sca-1<sup>-</sup>Kit<sup>+</sup>FcγR<sup>+</sup>CD34<sup>+</sup> (GMPs) progenitors, Lin<sup>-</sup>Sca-1<sup>-</sup>Kit<sup>+</sup>FcγR<sup>-</sup>CD34<sup>+</sup> (CMPs) progenitors and Lin<sup>-</sup>Sca-1<sup>-</sup>Kit<sup>+</sup>FcγR<sup>-</sup>CD34<sup>-</sup> (MEPs) progenitors.

## Supplementary Tables

**Supplementary Table 1: Identification of RIPK1 interacting proteins via mass spectrum.**

| <b>RIPK1-Mass-spectrum</b>  | <b>Protein</b> | <b>PSM</b> |
|-----------------------------|----------------|------------|
| <b>Scaffold proteins</b>    | TAB1           | 32         |
|                             | TAB2           | 24         |
|                             | TRADD          | 15         |
|                             | TAB3           | 1          |
| <b>Cell death complexes</b> | CASPASE8       | 131        |
|                             | FADD           | 109        |
|                             | CASPASE9       | 3          |
|                             | cFLIP          | 2          |

**Supplementary Table 2: Primer sequences for generation of *Ripk1*<sup>Y383F/Y383F</sup> mice.**

|       |                                                                                                                                      |
|-------|--------------------------------------------------------------------------------------------------------------------------------------|
| sgRNA | 5'-tattccaaaagcatgataggc-3'                                                                                                          |
| Donor | 5'-cacaggacgagaatgatcgcagtgctgcaggctaagctgcaagaggaagc<br>aagtttcatgctttggaatattgcagagaaacagacaaaaccgcagccaaggca<br>gaatgaggcttaca-3' |

**Supplementary Table 3.** The primer sequences for genotyping PCR.

|             | Forward Primer (5'--3') | Reverse Primer (5'--3') |
|-------------|-------------------------|-------------------------|
| RIPK1 WT    | agctgcaagaggaagccagcta  | gtgctgggatcagaatgacc    |
| RIPK1 K376R | agctgcaagaggaagcaagttt  | gtgctgggatcagaatgacc    |



**Supplementary Table 4.** The primer sequences for qRT-PCR.

| Gene                         | Forward Primer (5'--3') | Reverse Primer (5'--3') |
|------------------------------|-------------------------|-------------------------|
| <i>Gapdh</i>                 | aacagcaactcccactcttc    | cctgttgctgtagccgtatt    |
| <i>Il1<math>\beta</math></i> | gaaatgccacctttgacagtg   | tggatgctctcatcaggacag   |
| <i>Tnf</i>                   | ctaccttggtgcctcctcttt   | gagcagagggttcagtgatgtag |
| <i>IkBa</i>                  | tgaaggacgaggagtacgagc   | ttcgtggatgattgccaagtg   |
| <i>Cxcl10</i>                | ccaagtgctgccgtcatttc    | ggctcgcagggatgattcaa    |

**Supplementary Table 5.** The primer sequences for generating MK2 deficient MEFs.

|            | Oligo 1                   | Oligo 2                    |
|------------|---------------------------|----------------------------|
| MK2 sgRNA1 | CACCGcgccatcaccgacgactaca | AAACtgtagtcgctcggtgatggcgC |
| MK2 sgRNA2 | CACCGggcccgacttgacgtggaac | AAACgttcacgtcaagtctgggccC  |
